Title: Allatostatin A-like immunoreactivity in the nervous system and gut of the larval midge,  
*Chironomus riparius* (Meigen): Modulation of hindgut motility, rectal K<sup>+</sup> transport and  
implications for exposure to salinity.

Authors: Lisa Robertson \*, Helen Chasiotis \*, Vladimir Galperin, Andrew Donini

\* joint first authors

Affiliations: Department of Biology, York University, 4700 Keele Street, Toronto, ON, Canada,  
M3J 1P3.

Running Head: AST inhibit hindgut motility and K<sup>+</sup> flux

Corresponding Author:

Andrew Donini

Email Address: [adonini@yorku.ca](mailto:adonini@yorku.ca)

Tel.: +1 416 736 2100 ext. 21096

Fax: +1 416 736 5698

## SUMMARY

Evidence for the presence of allatostatin (AST) A-like neuropeptides in the larval midge, *Chironomus riparius* is reported. Immunohistochemical studies on the nervous system and gut revealed the presence of AST A-like immunoreactive (AST-IR) cells and processes. The nerve cord contained AST-IR processes that originated from cells in the brain and travelled the length of nerve cord to the terminal ganglion. Within each ganglion, these processes gave rise to varicosities suggesting that they formed synapses with neurons in the ganglia. Endocrine cells containing AST-IR were present in three regions of the midgut: near the attachment of the Malpighian tubules, between the anterior and posterior midgut and in the vicinity of the gastric caecae. The terminal ganglion also contained 4 AST-IR cells which gave rise to axons that projected onto the hindgut and posterior midgut. Application of a cockroach AST to the semi-isolated hindgut of larval *C. riparius* led to dose-dependent inhibition of muscle contractions with an  $EC_{50}$  of  $\sim 10$  nM and a decrease in rectal  $K^+$  reabsorption resulting from reduced rectal  $Na^+/K^+$ -ATPase (NKA) and vacuolar type  $H^+$ -ATPase (VA) activities. The results suggest the presence of endogenous AST-like neuropeptides in the larval midge *C. riparius* where these factors play a role in the function of the gut. Furthermore, regulation of ion reabsorption by ASTs at the rectum could serve as an ideal mechanism of ion regulation in the face of abrupt and acute elevated salt levels.

## KEYWORDS

Na/K ATPase, V-ATPase, ion transport, epithelium, muscle, ion regulation

## ABBREVIATIONS

|            |                                                                                                    |
|------------|----------------------------------------------------------------------------------------------------|
| AST-IR     | allatostatin-A(family of peptides with C terminal ending of FGLamide) immunoreactivity.            |
| Dippu-AST7 | peptide with APSGAQRLYGFGLamide sequence isolated from the cockroach, <i>Diploptera punctata</i> . |
| NKA        | $Na^+/K^+$ -ATPase from the P-type family of ATPases                                               |
| VA         | Vacuolar-type $H^+$ -ATPase                                                                        |

## INTRODUCTION

Juvenile hormones are synthesized by the *corpora allata* and control the juvenile characteristics of insects during growth and development. In adult insect females, juvenile hormones can also regulate reproductive activities such as the maturation of oocytes. Synthesis of juvenile hormones is inhibited by allatostatins, members of a large and diverse family of peptides which are structurally characterized into three distinct groups (Gade and Goldsworthy, 2003).

The C-Type allatostatins with an N-terminal pGlu residue and a free C-terminus have been discovered in the moth *Manduca sexta*, the fly *Drosophila melanogaster* and the mosquito *Aedes aegypti* (Kramer et al., 1991; Williamson et al., 2001; Li et al., 2006). The B-Type allatostatins all have a common Trp-(X<sub>6</sub>)-Trp-amide C-terminus and were first discovered in the cricket (Wang et al., 2004). The A-Type allatostatins (ASTs) were the first to be discovered in the cockroach and share a Phe-Gly-Leu-amide C-terminus (Donly et al., 1993; Siju et al., 2014).

All allatostatins inhibit juvenile hormone synthesis in at least one group or species of insect; however, many do not in other insects, and instead have known inhibitory activity on contractile properties of muscle (Gade and Goldsworthy, 2003). In particular, the ASTs have been shown to inhibit contractions of visceral muscle including foregut and hindgut (Lange et al., 1993; Sarkar et al., 2003; Predel et al., 2001; Matthews et al., 2008) and ASTs have been localized to endocrine cells of the gut (Veenstra et al., 1995; Veenstra, 2009; Reichwald et al., 1994; Robertson and Lange, 2010), suggesting that ASTs may have a role in feeding and digestion. In the cockroach, ASTs have been shown to decrease food consumption (Aguilar et al., 2003). There is increasing evidence that ASTs modulate ion transport of various regions of the gut (Onken et al., 2004; Vanderveken and O'Donnell, 2014). An important group of insects in which ASTs have not been studied are the midges.

Midge larvae (*Chironomus riparius*) are ubiquitous benthic inhabitants of freshwater lakes, ponds, marshes and rivers in temperate regions of the Northern hemisphere and have become important bioindicators of environmental pollution resulting from industrial effluents, sewage effluents and other anthropogenic sources (Moreau et al., 2008; Faria et al., 2006). *C. riparius* have also been observed in naturally occurring and anthropogenically induced salinated water (Colbo, 1996; Williams and Williams, 1998). Endocrine disruptors affect midge larvae by altering the accumulation of yolk protein in eggs, inducing expression of Hsp70, activating the

enzymes catalase and glutathione-S-transferase, and reducing the rate of successful adult emergence (Lee and Choi, 2007; Morales et al., 2011; Hahn et al., 2002). Despite their importance, very little is known about the physiological mechanisms that are underlying the observed responses to xenobiotics, heavy metals, endocrine disruptors and salinity in midge larvae. In particular, to the best of our knowledge there is only a single study that examined neuroendocrine factors in midge larvae revealing the presence of serotonin and the peptides, proctolin and bombesin in neurons of *Chironomus tentans* (Johansson et al., 1986).

Since allatostatins play a role in development and control aspects of feeding and digestion, factors that are affected by pollutants and endocrine disruptors in midges, it was hypothesized that allatostatins are present in midge larvae where they could affect gut motility and ion transport. This study examined the presence of AST-like immunoreactivity in the nervous system and the gut of the larval midge, *Chironomus riparius*. A novel midge larval hindgut motility assay was developed to assess potential effects of ASTs on the hindgut musculature. Effects of ASTs on rectal ion transport and rectal  $\text{Na}^+/\text{K}^+$ -ATPase (NKA) and vacuolar-type  $\text{H}^+$ -ATPase (VA) activities were also determined. The results led to an unexpected link between the effects of ASTs in midge larvae and larval habitat salinity.

## RESULTS

### *AST A-Like Immunoreactivity in Gut and Nervous System:*

Allatostatin A-like immunoreactivity (AST-IR) is present throughout the ventral nerve cord and gut of larval *C. riparius* (Fig. 1). Diagrammatical representations of AST-IR in neurons, neural processes and neuroendocrine cells in the gut and nervous system are shown in Fig. 2. The midgut contains three regions with AST-IR endocrine-like cells (Fig. 1A, B; Fig. 2A). One region is located at the middle midgut (Fig. 1A; Fig. 2A), another region is located at the posterior midgut near the attachment of the Malpighian tubules (Fig. 1B; Fig. 2A), and some endocrine-like cells were found in the vicinity of the gastric caecae, albeit in fewer numbers with respect to the other two regions (Fig. 2A). The endocrine-like cells possessed a single short process that extended from the soma towards the midgut lumen (Fig. 1A inset).

A number of AST-IR cells are located in the brain and give rise to neuropile and processes that run posteriorly into the nerve cord (Fig 1C; Fig. 2B). These processes extend the length of the abdominal nerve cord through the connectives between ganglia and within the

ganglia (Fig. 2B). As the processes pass through the ganglia, they have varicosities along their length (Fig. 1D). No AST-IR cell bodies are found in the abdominal ganglia; however, the terminal ganglion contains 4 AST-IR cells (Fig. 1E; Fig. 2B) and at least 2 of these give rise to processes in the proctodeal nerves which innervate the rectum, ileum and posterior midgut (Fig. 1F, G, H and B; Fig. 2). The AST-IR in these is not continuous and instead appear as distinct punctate varicosities along the process (see Fig. 1G, H and B). Controls where the primary AST antiserum was omitted or pre-absorbed with  $10^{-5}$  mol l<sup>-1</sup> Dippu-AST7 resulted in no staining throughout the gut and nervous system (not shown).

### ***Effects of Dippu-AST7 on Hindgut Contractions:***

The semi-isolated larval hindgut of *C. riparius* bathed in a physiological saline contracted in a non-rhythmic manner and these contractions can be detected with an impedance monitor and viewed with data acquisition software. Each single contraction produced a vertical deflection of the recording voltage trace which was easily discernible above background noise (Fig. 3). It was not possible to localize contractions to specific regions of the hindgut since contractions of the ileum or rectum were detected by the impedance electrodes. Contractions that were visibly seen to occur at the posterior midgut were not detected by the impedance electrodes since the minuten pins inserted at the posterior midgut limited movements of this region.

In the presence of Dippu-AST7 the frequency of hindgut contractions decreased with respect to the frequency of contractions recorded in physiological saline without the peptide (Fig. 3, compare saline with Dippu-AST7 doses). This effect was dependent on the dose of Dippu-AST7, where increasing doses resulted in fewer hindgut contractions. Dippu-AST7 inhibited hindgut contractions with a threshold dose of  $\sim 0.5$  nmol l<sup>-1</sup> and an EC<sub>50</sub> of  $\sim 10$  nmol l<sup>-1</sup> (Fig. 4). Application of 1  $\mu$ M Dippu-AST7 did not abolish contractions but inhibited the contractions by  $\sim 95\%$ .

### ***Effects of Dippu-AST7 on K<sup>+</sup> Absorption by the Rectum, and NKA and VA Activities in the Rectum:***

The rectum of larval *C. riparius* is a site of K<sup>+</sup> absorption (see Jonusaite et al., 2013). The mean baseline K<sup>+</sup> flux (absorption, lumen to bath) measured at the recta in this study was  $104.3 \pm 13.7$  pmol cm<sup>-2</sup> s<sup>-1</sup> (n=38). Addition of various doses of Dippu-AST7 to the recta resulted in a

dose-dependent decrease in the  $K^+$  flux (Fig. 5). Addition of saline (control) or a low dose of Dippu-AST7 (1 pmol  $l^{-1}$ ) did not affect the  $K^+$  fluxes. The highest dose of Dippu-AST7 tested (1  $\mu$ mol  $l^{-1}$ ) resulted in  $K^+$  fluxes that were roughly half of the initial baseline  $K^+$  flux.

NKA and VA activities in the rectum of larval *C. riparius* are ~ 15 to 20 times higher than in other regions of the gut including the Malpighian tubules, and evidence was provided that NKA and VA drive  $K^+$  absorption at the rectum (see Jonusaite et al., 2013). Incubation with 10 nmol  $l^{-1}$  Dippu-AST7 for 10 minutes decreased the NKA and VA activities of the rectum by ~ 1/2 and 2/3, respectively (Fig. 6).

#### ***NKA and VA Protein Expression in Recta of Freshwater and Brackish Water-Reared Larva:***

A previous study demonstrated that recta of brackish water-reared larvae have lower activities of NKA and VA compared to recta of freshwater reared larvae (see Jonusaite et al., 2013). Therefore salinity and AST7 have similar effects on rectal NKA and VA activities. The actions of AST7 occur rapidly and hence cannot be mediated by changes in NKA and VA expression; however, it was suggested that larvae reared in brackish water may have lower expression of rectal NKA and VA than those reared in freshwater (Jonusaite et al., 2013). In an effort to determine if the mechanisms of AST7 and salinity induced changes in NKA and VA rectal activities are similar or different NKA and VA protein expression studies on freshwater and brackish water-reared larvae were carried out.

NKA  $\alpha$  subunit was detected by Western blot as a single band at ~95 kDa in recta collected from *C. riparius* larva (Fig. 7A). Recta from brackish water reared animals however exhibited ~4-fold less NKA  $\alpha$  subunit protein expression than recta collected from freshwater (control) reared larvae (Fig. 7B). In all samples examined, VA B subunit was detected as a single band at ~56 kDa by Western blot, however a second band at ~58 kDa was also occasionally detected, but this did not appear to be correlated with rearing salinity (Fig. 7A). Densitometric analysis of the ~56 kDa band revealed relatively variable VA B subunit protein expression within recta collected from the freshwater (control) reared group (Fig. 7B). VA B subunit protein expression within recta collected from freshwater larva was not significantly different from protein levels in recta from the brackish water reared group (Fig. 7B). Actin expression, which was used as a loading control to normalize NKA and VA protein abundance, was not

significantly different (Student's *t*-test  $p=0.4232$ ; data not shown) between recta collected from control and brackish water reared animals.

## DISCUSSION

### *AST-like Immunoreactivity in the Nervous System and Gut:*

Allatostatin immunoreactivity has been well documented in the nervous systems of insects with AST-IR cell bodies routinely found in the brain and abdominal ganglia (Skiebe et al., 2006; Zitnan et al., 1993; Kreissel et al., 1999; Lange et al., 1993; Hernandez-Martinez et al., 2005). In *C. riparius* larvae, the brain contains at least 5 paired AST-IR cell bodies at the anterior edge of the frontal lobes (Fig. 1C; Fig. 2B). Processes originating from these cells appear to enter the central complex which contains extensive AST-IR. Processes cross the center of the brain to the respective contralateral side and are seen running posteriorly into the nerve cord. In *C. riparius* larvae, only the terminal ganglion contained AST-IR cell bodies while only processes with many varicosities were present in the remaining ganglia (Fig. 1D, E; Fig. 2B). The processes in the ganglia are likely to originate from the neurons in the brain, suggesting that allatostatins act as neurotransmitters relaying information from the brain to other neurons in the ganglia of the ventral nerve cord in larval *C. riparius*. Similar processes have been found in other insects (Skiebe et al., 2006; Zitnan et al., 1993). At least 1 of the 2 pairs of lateral neurons in the terminal ganglion give rise to processes that innervate the hindgut (see Fig. 1F, G, H; Fig. 2B) and these processes extend the length of the rectum, ileum and onto the posterior midgut (Fig. 1B; Fig. 2A). Nerves containing AST-IR on the hindgut that originate from neurons in the terminal ganglion/neuromere have been found in the cockroach, locust, moth, fruit-fly and mosquito (Maestro et al., 1998; Yoon and Stay, 1995; Duve et al., 1997; Roberston and Lange, 2010; Hernandez-Martinez et al., 2005). In the cockroach, branches of at least one pair of AST-like IR neurons project to the hindgut and were also seen to extend onto the midgut (Maestro et al., 1998). In the larval moth *Cydia pomonella*, larval *Drosophila* and adult mosquitoes, the processes from the terminal ganglion neurons are confined to the hindgut (Duve et al., 1997; Yoon and Stay, 1995; Hernandez-Martinez et al., 2005).

In larval *C. riparius* AST-IR endocrine cells are found in the posterior midgut near the attachment of the Malpighian tubules to the gut (Fig. 1B; Fig. 2A). Another group of endocrine



cells is located in the middle midgut region (Fig. 1A; Fig. 2A) and a third group is found in the anterior midgut associated with the gastric caecae (Fig. 2A). Other Dipteran species have regional groups of AST-IR endocrine cells in the midgut. The adult female mosquito contains AST-IR endocrine cells only in the posterior region of the midgut (Hernandez-Martinez et al., 2005), as do larval and adult *Drosophila* (Yoon and Stay, 1995). The larval Lepidopteran *C. pomonella* also has AST-IR endocrine cells confined to the posterior midgut (Duve et al., 1997) while other insects have an apparent even distribution of cells along the entire midgut (Robertson and Lange, 2010; Sarkar et al., 2003; Maestro et al., 1998). The regionalization of AST-IR endocrine cells in the midgut of Dipterans and Lepidopterans may be a consequence of digestive processes requiring high luminal alkalinity since these larvae have regional differences in luminal pH in the midgut (Boudko et al., 2001; Shanbhag and Tripathi, 2005; Coddington and Chamberlin, 1999). The function of the AST-IR endocrine cells in the midgut is unclear. These cells may sense nutritional content and AST may affect midgut muscle, enzyme production and/or ion transport. Further study in these areas can determine the function of AST in the endocrine cells.

#### ***AST Effects on Hindgut Muscle Contraction and $K^+$ Reabsorption:***

AST inhibits the contractions of the larval midgut hindgut in a dose-dependent manner (Fig. 3 and 4). This suggests that the hindgut muscle expresses receptors for AST. Many previous studies have demonstrated that AST is a myoinhibitory peptide in insects (Sarkar et al., 2003; Lange et al., 1993; Onken et al., 2004; Duve et al., 2000). A dose of  $1 \text{ pmol l}^{-1}$  non-native AST on foregut and hindgut of *Lacnobia oleracea* and *Rhodnius prolixus*, respectively (Sarkar et al., 2003; Duve et al., 2000) are effective at inhibiting muscle contractions. The larval midgut hindgut responds to a threshold dose of  $5 \text{ nmol l}^{-1}$  non-native AST from cockroach. This result, together with the presence of AST-IR in processes on the hindgut that originate from cells in the terminal ganglion, suggest that AST-like neuropeptides are acting as inhibitory neurotransmitters and/or neuromodulators of hindgut muscle in larval *C. riparius*. The inhibition of hindgut muscle contraction by AST should prolong the time luminal contents remain in the hindgut prior to excretion. In a previous study, our laboratory has shown that the rectum of larval *C. riparius* is a site of  $K^+$  reabsorption and that this is dependent on the activities of NKA and VA which are expressed on the basal and apical membranes of epithelial cells, respectively (Jonusaite et al.,



237 2013). In that study, it was shown that the recta of larvae reared under dilute freshwater or ion-  
 238 poor conditions had relatively high NKA and VA activities and exhibited high rates of  $K^+$   
 239 reabsorption. Conversely the recta of larvae reared in brackish water had low NKA and VA  
 240 activities and exhibited low rates of  $K^+$  reabsorption (see Jonusaite et al., 2013). Application of  
 241 AST to the larval recta decreased  $K^+$  reabsorption in a dose-dependent manner (Fig. 5). A dose  
 242 of  $10 \text{ nmol l}^{-1}$  AST also decreased the NKA and VA activities in larval recta (Fig. 6). Together,  
 243 these results indicate that AST inhibits  $K^+$  reabsorption by lowering the activities of NKA and  
 244 VA in the larval recta. The actions of exogenously applied AST on hindgut motility and ion  
 245 reabsorption suggest that AST functions as a general depressant of hindgut functions; however,  
 246 since the rectum receives direct innervation from neurons of the terminal ganglion, it is  
 247 conceivable that the modulation of muscle activity and epithelial transport can be independently  
 248 controlled. Studies have shown that AST modulates gut muscle activity (Sarkar et al., 2003;  
 249 Duve et al., 2000). Studies have also provided evidence that AST directly modulates ion  
 250 transport activities in gut epithelia (Onken et al., 2004; Vanderveken and O'Donnell, 2014). By  
 251 simultaneously and perhaps independently modulating transit time of hindgut luminal contents  
 252 and the magnitude of epithelial ion reabsorption through direct neural control, the midge would  
 253 greatly increase its ability to fine tune the reabsorptive and excretory functions of the hindgut.

### 255 ***Modulating Rectal Ion Reabsorption with AST and Habitat Salinity***

256 The larvae of *C. riparius* are found in waters of widely varying ionic content. In dilute  
 257 freshwater and ion-poor conditions, the anal papillae take up ions while the rectum reabsorbs  
 258 ions therefore countering the loss of ions and osmotic uptake of water from the dilute habitat  
 259 (Nguyen and Donini, 2010; Jonusaite et al., 2013). Larvae survive abrupt transfer to, and can be  
 260 reared in, brackish water (20% seawater) (Jonusaite et al., 2011; 2013). Abrupt transfer to  
 261 brackish water is accompanied by a sharp reduction in whole body VA activity and a less  
 262 pronounced decrease in whole body NKA activity (Jonusaite et al., 2011). The greatest amount  
 263 of NKA and VA activity can be attributed to the rectum and the recta of larvae reared in brackish  
 264 water have greatly reduced NKA and VA activities which coincide with reduced ion  
 265 reabsorption (Jonusaite et al., 2013).

266 Although the larval response to abrupt and long-term (rearing) exposure to brackish water  
 267 is the same, the mechanisms with which this is achieved are likely to be different. Abrupt

exposure to elevated salinity would require a rapid response which could be achieved with localized release of AST at the rectal epithelium resulting in a rapid reduction in NKA and VA activity (Fig. 6) and subsequent rapid reduction in ion reabsorption (Fig. 5). The observed rapid response to application of AST to the rectal epithelium is likely to result from activation of AST receptors on epithelial cells and subsequent second messenger pathways that impinge on the activities of NKA and VA. This scenario would be similar to the serotonin modulation of VA activity in the blowfly salivary glands (Baumann and Walz, 2012). Larvae of *C. riparius* that inhabit regions of Southern Canada and Northern United States encounter abrupt salination of their freshwater habitats in the spring when snow melt adjacent to roadways that were treated with salt in the winter enters surrounding water bodies that are inhabited by *C. riparius*. Often, these events produce substantial, acute increases in the ionic content of these bodies of water (Allert et al., 2012; Fay and Shi, 2012) and as such *C. riparius* would require a mechanism to regulate internal ion levels over the short term. Our results suggest that localized modulation of rectal reabsorption by AST could be such a mechanism.

When *C. riparius* larvae encounter sustained, long-term, elevated ionic conditions, continued synthesis and release of AST may be metabolically detrimental and therefore reducing NKA and VA expression in the rectal epithelium would be a more feasible solution. Indeed, protein expression of the catalytic NKA  $\alpha$ -subunit was significantly down-regulated in brackish water reared *C. riparius* larvae when compared to freshwater reared animals (Fig. 7). On the other hand, VA B subunit protein expression was unaltered by rearing salinity (Fig. 7). Regulation of VA enzyme activity in insect and vertebrate models has been shown to occur via many mechanisms, notably reversible dissociation of  $V_1$  and  $V_o$  domains, oxidation of disulfide bonds, and translocation of VA molecules to the plasma membrane via endo- and exocytosis from an intracellular vesicular pool (Baumann and Walz, 2012). Our results suggest that VA activity in the rectum of *C. riparius* is regulated in such ways by AST and also by longterm exposure to elevated salinity.

## Conclusions

In summary, the larvae of *C. riparius* possess neurons and midgut endocrine cells containing AST A-like factors. The extensive AST-IR processes in the brain and within the ganglia of the CNS suggest that AST A-like factors may coordinate various targets to carry out

important physiological roles. The presence of AST A-like factors in midgut endocrine cells suggests that one of these roles may be related to feeding and digestion. AST-IR neurons in the terminal ganglion send processes through the proctodeal nerves to directly innervate the hindgut where AST A inhibits muscle contraction and ion reabsorption. The inhibition of ion reabsorption at the rectum is achieved by decreasing the activities of NKA and VA and could serve as an effective mechanism of ion regulation in the face of abrupt, acute increases in habitat salinity.

## MATERIALS AND METHODS

### *Insects:*

A laboratory colony of *Chironomus riparius* were maintained in the Aquatic Facility in the Department of Biology at York University at 24°C and 12:12hr light, dark cycle. The larvae were reared in aerated 6 Liter aquaria with a 1 inch deep layer of sand on the bottom and filled with 3 L of dechlorinated tapwater. Larvae were fed every second day with TetraFin Goldfish flakes (Tetra Holding Inc., VA, USA) and the water was renewed weekly. Studies were conducted on 3<sup>rd</sup> and 4<sup>th</sup> instar larvae.

### *Immunohistochemistry:*

The central nervous system (CNS) and digestive system of larvae were processed to reveal allatostatin-like immunoreactivity utilizing a rabbit polyclonal antiserum against Dippu-AST 7 (R-AST; Kind gift from Dr. Stephen Tobe, Toronto). Cross reactivity of this antiserum to other allatostatins has been previously determined (Yu et al., 1995). Larvae were pinned through the cuticle to the bottom of a Sylgard® (Dow Corning, Mississauga, ON, Canada) lined dish filled with saline containing (in mmol l<sup>-1</sup>): 5 KCl; 74 NaCl; 1 CaCl<sub>2</sub>; 8.5 MgCl<sub>2</sub>; 10.2 NaHCO<sub>3</sub>; 8.6 HEPES; 20 glucose; 10 glutamine; pH 7.0 (BioShop, Burlington, ON, Canada). The CNS and gut were removed under saline and fixed with a solution of 2% paraformaldehyde in Millonig's buffer with composition (in mmol l<sup>-1</sup>): 136 NaH<sub>2</sub>PO<sub>4</sub>H<sub>2</sub>O; 120 NaOH; 67 glucose; 0.78 CaCl<sub>2</sub>2H<sub>2</sub>O; pH 7.0, at 4°C overnight or room temperature for 2 hours. All subsequent incubations were performed at 4°C unless otherwise indicated. Tissues were rinsed with phosphate buffered saline (PBS) 4 times at 5 minute intervals and incubated in a solution containing 2% normal sheep serum (NSS), 4% Triton-X-100 in PBS for 1 hour at room

temperature and subsequently in a solution of 3% skim milk powder (Nestlé, North York, ON, Canada) in PBS for 24 hours. The R-AST was pre-incubated at a dilution of 1:1000 in 0.4% Triton-X-100, 2% NSS in PBS for 24 hours. Tissues were incubated in the 1:1000 R-AST solution for 48 hours. Tissues were rinsed with PBS 5 times at 10 minute intervals and subsequently incubated in a solution containing 1:200 affinity purified Cy3 labeled sheep anti-rabbit antibody (Sigma-Aldrich, Oakville, ON, Canada), 10% NSS in PBS for 24 hours. Tissues were rinsed with PBS 10 times over 24 hours. Controls were processed in the same manner except that some were incubated in the absence of R-AST and others incubated in a 1:1000 R-AST solution pre-absorbed with  $10 \mu\text{mol l}^{-1}$  of *Diploptera punctata* Allatostatin 7 (Dippu-AST7, APSGAQRLYGFGLamide, AnaSpec, San Jose, CA, USA). Tissues were mounted in glycerol on glass slides and viewed with a Fluoview 300 laser scanning confocal microscope (Olympus, Markham, ON, Canada) using the Helium-Neon (543 nm) laser and digital images were captured with the accompanying Fluoview software package. Composite image figures were constructed using Adobe Photoshop CS2 (Adobe, Etobicoke, ON, Canada).

### ***Hindgut Motility Assay:***

The frequency of larval hindgut contractions was monitored with an impedance monitor (UFI Model 2991, Morro Bay, CA, USA) connected to a Powerlab 4/30 and desktop computer running LabChart 6.0 software (AD Instruments, Colorado Springs, CO, USA). A semi-isolated preparation contained in a Sylgard® lined dish and bathed in 2 mL of saline was developed. The preparation consisted of a portion of the posterior midgut with surrounding cuticle, exposed ileum and rectum, and the intact posterior section of the larva complete with anal papillae and prolegs. Minutin pins inserted into the cuticle at the base of the prolegs and the posterior midgut secured the preparation to the dish. Electrodes were fashioned from minutin pins soldered to wires connected to the impedance monitor inputs. With the aid of a stereomicroscope (Model K400 Series, Motic, Richmond, BC, Canada) the electrodes were positioned on either side of the preparation at the anterior rectum. Preparations were rinsed several times with fresh saline and then allowed to equilibrate in 1.98 mL of saline for 10 minutes. Contractions were monitored for the subsequent 10 minute intervals prior to, and after the addition of Dippu-AST7. The procedure was repeated to test several doses of Dippu-AST7 on individual preparations. Dippu-AST7 was administered by adding 20  $\mu\text{L}$  of 100 times the desired dose of the peptide to the saline bathing

the preparation. The addition of 20  $\mu\text{L}$  of saline to the bath served as a control. The Peak Analysis feature in LabChart Pro 6.0 software was utilized to determine the number of contractions that occurred over the 10 minute intervals and yield the frequency of contractions (number of contractions  $\text{min}^{-1}$ ). Effects of individual doses of Dippu-AST7 on the frequency of contractions were determined by expressing the frequency of contractions in the presence of Dippu-AST7 as a percentage of the frequency of baseline contractions recorded during the 10 minute interval prior to the addition of the peptide.

### ***Hindgut $\text{K}^+$ Flux Measurements:***

$\text{K}^+$  concentration gradients were measured adjacent to the rectum of larval *C. riparius* with the Scanning Ion-selective Electrode Technique (SIET) and used to calculate  $\text{K}^+$  flux at the rectum. The hindgut preparation for these measurements was previously described in detail (Jonusaite et al., 2013). In brief, the entire gastrointestinal tract of 3<sup>rd</sup> instar *C. riparius* was isolated in saline (see section above for composition of saline) and then positioned onto the bottom of an inverted 35 mm petri dish lid containing 4 mL of saline. The SIET system and protocol used has been described in detail (Jonusaite et al., 2013; Rheault and O'Donnell, 2001; Donini and O'Donnell, 2005). In brief, a  $\text{K}^+$  ion-selective microelectrode (ISME) was mounted onto an Ag/AgCl wire electrode holder (World Precision Instruments) that was connected to a headstage. The headstage was connected to an ion polarographic amplifier (IPA-2, Applicable Electronics, Forestdale, MA, USA). A 3% agar in 3 mol  $\text{l}^{-1}$  KCl bridge connected to the headstage with an Ag/AgCl half-cell (WPI) was used as the reference electrode. The  $\text{K}^+$  ISMEs were calibrated in solutions of 1 and 10 mmol  $\text{l}^{-1}$  KCl resulting in a mean slope of  $58.9 \pm 0.57$ ,  $n = 33$ . Measurements were taken along the length of the rectum by positioning the ISME 2 – 5  $\mu\text{m}$  from the surface of the rectum and recording a voltage for 1 second. The ISME was then positioned 100  $\mu\text{m}$  away from the original recording site, perpendicular to the tissue surface, where a second voltage was recorded for 1 second. A wait time of 4 seconds where no recording took place was employed after each movement of the ISME. This sampling method was then repeated 4 times at each site along the length of the rectum. Positioning the ISME and calculation of voltage gradients were performed using the Automated Scanning Electrode Technique (ASET) software (version 2.0, Science Wares, East Falmouth, MA, USA). To account for mechanically derived disturbances in the ion gradients through movement of the ISME,

control measurements were recorded using the same sampling method but at sites that were 2 – 3 mm away from the surface of the rectum. To calculate  $K^+$  fluxes, the voltage gradients were first converted into concentration gradients with the following equation:

$$\Delta C = C_B \times 10^{(\Delta V/S)} - C_B$$

where  $\Delta C$  is the concentration gradient between the two points measured in  $\mu\text{mol l}^{-1} \text{ cm}^{-3}$ ;  $C_B$  is the background ion concentration, calculated as the average of the concentration at each point measured in  $\mu\text{mol l}^{-1}$ ;  $\Delta V$  is the voltage gradient obtained from ASET in  $\mu\text{V}$ ; and  $S$  is the slope of the electrode. Using the calculated concentration gradients, a corresponding flux value was then derived using Fick's law of diffusion as follows:

$$J_I = D_I(\Delta C) / \Delta x ,$$

where  $J_I$  is the net flux of the ion in  $\text{pmol cm}^{-2} \text{ s}^{-1}$ ;  $D_I$  is the diffusion coefficient of the ion ( $1.92 \times 10^{-5} \text{ cm}^2 \text{ s}^{-1}$  for  $K^+$ );  $\Delta C$  is the concentration gradient in  $\text{pmol cm}^{-3}$ ; and  $\Delta x$  is the distance between the two points measured in cm.

#### ***Measurement of $\text{Na}^+/\text{K}^+$ -ATPase (NKA) and Vacuolar Type $\text{H}^+$ -ATPase (VA) Activities of the Rectum Exposed to AST:***

In aquaria identical to those outlined above, eggs were hatched and larva were reared to third and fourth instar (~30 days) in ion-poor water (composition in  $\mu\text{mol l}^{-1}$ :  $[\text{Na}^+]$  20;  $[\text{Cl}^-]$  40;  $[\text{Ca}^{2+}]$  2;  $[\text{K}^+]$  0.4; pH 6.5). Larval recta were then isolated under saline and individually incubated with either saline (control) or saline containing  $10^{-8} \text{ mol l}^{-1}$  Dippu-AST7 for 10 minutes at room temperature. After incubation, the recta were collected in 1.5 mL microcentrifuge tubes (30-35 recta per tube), flash-frozen and stored at  $-85^\circ\text{C}$  until further analysis. For NKA and VA activity assays, recta were thawed on ice and processed according to previously described methods (Jonusaite et al., 2011). NKA and VA activity assays were subsequently conducted using the methodology of McCormick (1993) with modifications as described by Jonusaite et al. (2011).



### ***NKA and VA Protein Expression in Recta of Larvae reared in freshwater and brackish water:***

In the following experiment, eggs were hatched and larvae were reared as described above in brackish water composed of 7 g l<sup>-1</sup> Instant Ocean Sea Salt (i.e. 20% seawater, approximately equivalent to 96 mmol l<sup>-1</sup> NaCl; United Pet Group, Blacksburg, VA, USA). Freshwater (control) animals also were reared in dechlorinated tapwater as described above. Recta from freshwater and brackish water reared larvae were then isolated under saline and collected into 1.5 mL microcentrifuge tubes (25-30 recta per tube), flash-frozen and stored at -85°C until further processing. For Western blot analysis, recta were thawed and homogenized on ice in chilled homogenization buffer (50 mmol l<sup>-1</sup> Tris-HCl pH 7.4, 1 mmol l<sup>-1</sup> PMSF) containing 1:200 protease inhibitor cocktail using glass Kontes handheld tissue grinders. Homogenates were then centrifuged at 8000g for 10 minutes at 4°C, and protein content of collected supernatant was determined using the Bradford assay (Sigma-Aldrich) according to the manufacturer's guidelines. Samples were prepared for SDS-PAGE by either incubating for 10 minutes at 65°C for NKA samples or by boiling for 5 minutes at 100°C for VA samples with 5x loading buffer containing 225 mmol l<sup>-1</sup> Tris-HCl (pH 6.8), 3.5% (w/v) SDS, 35% glycerol, 12.5% (v/v) β-mercaptoethanol and 0.01% (w/v) bromophenol blue. Equal amounts of sample (i.e. 5 µg each) were electrophoretically separated by SDS-PAGE and Western blot analysis of NKA and VA were conducted according to procedures outlined by Chasiotis and Kelly (2008) using a 1:100 dilution of mouse monoclonal anti-α5 antibody (Developmental Studies Hybridoma Bank, Iowa City, IA, USA) for NKA α-subunit and a 1:1000 dilution of rabbit polyclonal anti-ATP6V1B1 antibody (Abnova, Neihu District, Taipei City, Taiwan) for VA B subunit. After examination of NKA and VA protein expression, membranes were stripped and re-probed with a 1:100 dilution of mouse monoclonal anti-JLA20 antibody (Developmental Studies Hybridoma Bank) for actin as a loading control. Densitometric analysis of NKA, VA and actin protein was conducted using Quantity One 1D analysis software (Bio-Rad Laboratories Canada, Mississauga, ON, Canada). NKA and VA protein abundance was expressed as a normalized value relative to actin abundance.

### **ACKNOWLEDGEMENTS**

The authors thank Dr. Stephen Tobe (Toronto) for providing the allatostatin antisera as a kind gift, Hang Nguyen for conducting preliminary immunohistochemical studies and Dr. Marjorie



Patrick (San Diego) for advising on Western blot protocols for small tissues. Mouse monoclonal anti- $\alpha 5$  and anti-JLA20 antibodies, developed by D.M. Fambrough and J.J-C. Lin respectively, were obtained from the Developmental Studies Hybridoma bank, created by the NICHD of the NIH and maintained at The University of Iowa, Department of Biology, Iowa City, IA 52242.

#### **FUNDING**

This work was supported by a Natural Sciences and Engineering Research Council of Canada (NSERC) Discovery Grant to A.D., and an Ontario Ministry of Research and Innovation Early Researcher Award to A.D.

## REFERENCES

- Allert, A.L., Cole-Neal, C.L. and Fairchild, J.F.** (2012). Toxicity of chloride under winter low-flow conditions in an urban watershed in central Missouri, USA. *Bull. Env. Contam Toxicol.* **89**, 296-301.
- Aguilar, R., Maestro, J.L., Vilaplana, L., Pascual, N., Piulachs, M.D. and Belles, X.** (2003). Allatostatin gene expression in brain and midgut, and activity of synthetic allatostatins on feeding-related processes in the cockroach *blattella germanica*. *Regul Pept.* **115**(3), 171-177.
- Baumann, O. and Walz, B.** (2012). The blowfly salivary gland – A model system for analyzing the regulation of plasma membrane V-ATPase. *J Insect Physiol.* **58**(4), 450-458.
- Boudko, D.Y., Moroz, L.L., Harvey, W.R. and Linser, P.J.** (2001). Alkalinization by chloride/bicarbonate pathway in larval mosquito midgut. *Proc Natl Acad Sci USA.* **98**(26), 15354-15359.
- Chasiotis, H. and Kelly, S.P.** (2008). Occludin immunolocalization and protein expression in goldfish. *J Exp Biol.* **211**(10), 1524-1534.
- Coddington, E.J. and Chamberlin, M.E.** (1999). Acid base transport across the midgut of the tobacco hornworm, *manduca sexta*. *J Insect Physiol.* **45**(5), 493-500.
- Colbo, M.H.** (1996). Chironomidae from marine coastal environments near St. John's, Newfoundland, Canada. *Hydrobiol.* **318**, 117-122.
- Cranston, P.S.** (1995). Biogeography. In *The Chironomidae: biology and ecology of non-biting midges* (ed. P.D. Armitage, P.S. Cranston and L.C.V. Pinder), pp. 1-7. New York: Chapman & Hall.
- Donini, A. and O'Donnell, M.J.** (2005). Analysis of Na<sup>+</sup>, Cl<sup>-</sup>, K<sup>+</sup>, H<sup>+</sup> and NH<sub>4</sub><sup>+</sup> concentration gradients adjacent to the surface of anal papillae of the mosquito *Aedes aegypti*: application of self-referencing ion-selective microelectrodes. *J Exp Biol.* **208**, 603-610.
- Donly, B.C., Ding, Q., Tobe, S.S. and Bendena, W.G.** (1993). Molecular-cloning of the gene for the allatostatin family of neuropeptides from the cockroach *Diploptera-punctata*. *Proc Natl Acad Sci USA.* **90**(24):12055-12055.
- Duve, H., Audsley, N., Weaver, R.J. and Thorpe, A.** (2000). Triple co-localisation of two types of allatostatin and an allatotropin in the frontal ganglion of the lepidopteran *Lacanobia oleracea* (noctuidae): Innervation and action on the foregut. *Cell Tissue Res.* **300**(1), 153-163.
- Duve, H., Johnsen, A.H., Maestro, J.L., Scott, A.G., Crook, N., Winstanley, D. and Thorpe, A.** (1997). Identification, tissue localisation and physiological effect in vitro of a neuroendocrine

- 496 peptide identical to a dipteran leu-callatostatin in the codling moth *Cydia pomonella* (Tortricidae:  
497 Lepidoptera). *Cell Tissue Res.* **289**(1), 73-83.
- 498 **Faria, M.S., Re, A., Malcato, J., Silva, P.C.L.D., Pestana, J., Agra, A.R., Nogueira, A.J.A.**  
499 **and Amadeu, M.V.M.** (2006). Biological and functional responses of in situ bioassays with  
500 *Chironomus riparius* larvae to assess river water quality and contamination. *Sci Total Environ.*  
501 **371**(1-3), 125-137.
- 502 **Fay, L. and Shi X.** (2012). Environmental impacts of chemicals for snow and ice control: state  
503 of knowledge. *Water Air Soil Pollut.* **223**, 2751-2770.
- 504 **Gade, G., and Goldsworthy, G.J.** (2003). Insect peptide hormones: A selective review of their  
505 physiology and potential application for pest control. *Pest Manag Sci.* **59**(10), 1063-1075.
- 506 **Gillis, P.L., and Wood, C.M.** (2008). Investigating a potential mechanism of Cd resistance in  
507 *Chironomus riparius* larvae using kinetic analysis of calcium and cadmium uptake. *Aquat*  
508 *Toxicol.* **89**(3), 180-187.
- 509 **Hahn, T., Schenk, K., and Schulz, R.** (2002). Environmental chemicals with known endocrine  
510 potential affect yolk protein content in the aquatic insect *Chironomus riparius*. *Environ Pollut.*  
511 **120**(3), 525-528.
- 512 **Hernandez-Martinez, S., Li, Y.P., Lanz-Mendoza, H., Rodriguez, M.H. and Noriega, F.G.**  
513 (2005). Immunostaining for allatotropin and allatostatin-A and -C in the mosquitoes *Aedes*  
514 *aegypti* and *Anopheles albimanus*. *Cell Tissue Res.* **321**(1), 105-113.
- 515 **Johansson, O., Olsson, A. and Wieslander, L.** (1986). The distribution of putative  
516 neurotransmitters in the nervous-system of the dipteran *Chironomus tentans* insect larva - an  
517 immunohistochemical study using antisera to 5-hydroxytryptamine, tyrosine-hydroxylase,  
518 methionine-enkephalin, proctolin and bombesin. *Neurochem Int.* **8**(3), 311-326.
- 519 **Jonusaite, S., Kelly, S.P. and Donini, A.** (2011). The physiological response of larval  
520 *Chironomus riparius* (Meigen) to abrupt brackish water exposure. *J Comp Physiol B.* **181**(3),  
521 343-352.
- 522 **Jonusaite, S., Kelly, S.P. and Donini, A.** (2013). Tissue specific ionomotive enzyme activity  
523 and K<sup>+</sup> reabsorption reveal the rectum as an important ionoregulatory organ in larval  
524 *Chironomus riparius* exposed to varying salinity. *J Exp Biol.* **216**, 3637-3648.
- 525 **Kramer, S.J., Toschi, A., Miller, C.A., Kataoka, H., Quistad, G.B., Li, J.P., Carney, R.L.**  
526 **and Schooley, D.A.** (1991). Identification of an allatostatin from the tobacco hornworm  
527 *Manduca sexta*. *Proc Natl Acad Sci USA.* **88**(21), 9458-9462.
- 528 **Kreissl, S., Schulte, C.C., Agricola, H.J. and Rathmayer, W.** (1999) A single allatostatin-  
529 immunoreactive neuron innervates skeletal muscles of several segments in the locust. *J Comp*  
530 *Neurol.* **413**(4), 507-519.

- 531 **Lange, A.B., Chan, K.K. and Stay, B.** (1993) Effect of allatostatin and proctolin on antennal  
 532 pulsatile organ and hindgut muscle in the cockroach, *Diploptera-punctata*. Arch Insect Biochem  
 533 Physiol. **24(2)**, 79-92.
- 534 **Lee, S. and Choi, J.** (2007) Effects of bisphenol A and ethynyl estradiol exposure on enzyme  
 535 activities, growth and development in the fourth instar larvae of *Chironomus riparius* (diptera,  
 536 chironomidae). Ecotoxicol Environ Saf. **68(1)**, 84-90.
- 537 **Leonard, E.M., Pierce, L.M., Gillis, P.L., Wood, C.M. and O'Donnell, M.J.** (2009) Cadmium  
 538 transport by the gut and malpighian tubules of *Chironomus riparius*. Aquat Toxicol. **92(3)**, 179-  
 539 186.
- 540 **Li, Y., Hernandez-Martinez, S., Fernandez, F., Mayoral, J.G., Topalis, P., Priestap, H.,**  
 541 **Perez, M., Navare, A. and Noriega, F.G.** (2006) Biochemical, molecular, and functional  
 542 characterization of PISCF-allatostatin, a regulator of juvenile hormone biosynthesis in the  
 543 mosquito *Aedes aegypti*. J Biol Chem. **281(45)**, 34048-34055.
- 544 **Maestro, J.L., Belles, X., Piulachs, M.D., Thorpe, A. and Duve, H.** (1998). Localization of  
 545 allatostatin-immunoreactive material in the central nervous system, stomatogastric nervous  
 546 system, and gut of the cockroach *Blattella germanica*. Arch Insect Biochem Physiol. **37(4)**, 269-  
 547 282.
- 548 **Martinez, E.A., Wold, L., Moore, B.C., Schaumloffel, J. and Dasgupta, N.** (2006).  
 549 Morphologic and growth responses in *Chironomus tentans* to arsenic exposure. Arch Environ  
 550 Contam Toxicol. **51(4)**, 529-536.
- 551 **Matthews, H.J., Audsley, N. and Weaver, R.J.** (2008). In vitro and in vivo effects of myo-  
 552 active peptides on larvae of the tomato moth *Lacanobia oleracea* and the cotton leaf worm  
 553 *Spodoptera littoralis* (lepidoptera; noctuidae). Arch Insect Biochem Physiol. **69(2)**, 60-69.
- 554 **McCormick, S.D.** (1993). Methods for nonlethal gill biopsy and measurement of Na<sup>+</sup>, K<sup>+</sup>-  
 555 ATPase activity. Can J Fish Aquat Sci. **50(3)**, 656-658.
- 556 **Morales, M., Planello, R., Martinez-Paz, P., Herrero, O., Cortes, E., Luis Martinez-**  
 557 **Guitarte, J. and Morcillo, G.** (2011). Characterization of Hsp70 gene in *Chironomus riparius*:  
 558 Expression in response to endocrine disrupting pollutants as a marker of ecotoxicological stress.  
 559 Comp Biochem Physiol C-Toxicol Pharmacol. **153(1)**, 150-158.
- 560 **Moreau, X., Saez, G., Thiery, A., Clot-Faybesse, O., Guiraudie-Capraz, G., Bienboire-**  
 561 **Frosini, C., Martin, C. and De Jong, L.** (2008). ELISA detection of multixenobiotic resistance  
 562 transporter induction in indigenous freshwater chironomidae larvae (diptera): A biomarker  
 563 calibration step for in situ monitoring of xenobiotic exposure. Environ Pollut. **153(3)**, 574-581.
- 564 **Mousavi, S.K., Primicerio, R. and Amundsen, P.A.** (2003). Diversity and structure of  
 565 chironomidae (diptera) communities along a gradient of heavy metal contamination in a  
 566 subarctic watercourse. Sci Total Environ. **307(1-3)**, 93-110.

- 567 **Nguyen, H. and Donini, A.** (2010). Larvae of the midge *Chironomus riparius* possess two  
568 distinct mechanisms for ionoregulation in ion-poor conditions. *Am J Physiol Regul Integr Comp*  
569 *Physiol.* **299**, R762-R773.
- 570 **Onken, H., Moffett, S.B. and Moffett, D.E.** (2004). The anterior stomach of larval mosquitoes  
571 (*Aedes aegypti*): Effects of neuropeptides on transepithelial ion transport and muscular motility. *J*  
572 *Exp Biol.* **207(21)**, 3731-3739.
- 573 **Predel, R., Rapus, J. and Eckert, M.** (2001). Myoinhibitory neuropeptides in the american  
574 cockroach. *Peptides* **22(2)**, 199-208.
- 575 **Reichwald, K., Unnithan, G.C., Davis, N.T., Agricola, H. and Feyereisen, R.** (1994).  
576 Expression of the allatostatin gene in endocrine-cells of the cockroach midgut. *Proc Natl Acad*  
577 *Sci USA.* **91(25)**, 11894-11898.
- 578 **Rheault, M.R. and O'Donnell, M.J.** (2001). Analysis of epithelial K<sup>+</sup> transport in Malpighian  
579 tubules of *Drosophila melanogaster*: evidence for spatial and temporal heterogeneity. *J Exp Biol.*  
580 **204**, 2289-2299.
- 581 **Rippey, B., Rose, N., Yang, H., Harrad, S., Robson, M. and Travers, S.** (2008). An  
582 assessment of toxicity in profundal lake sediment due to deposition of heavy metals and  
583 persistent organic pollutants from the atmosphere. *Environ Int.* **34(3)**, 345-356.
- 584 **Robertson, L. and Lange, A.B.** (2010). Neural substrate and allatostatin-like innervation of the  
585 gut of *Locusta migratoria*. *J Insect Physiol.* **56(8)**, 893-901.
- 586 **Sarkar, N.R.S., Tobe, S.S. and Orchard, I.** (2003). The distribution and effects of diptu-  
587 allatostatin-like peptides in the blood-feeding bug, *Rhodnius prolixus*. *Peptides.* **24(10)**, 1553-  
588 1562.
- 589 **Shanbhag, S. and Tripathi, S.** (2005). Electrogenic H<sup>+</sup> transport and pH gradients generated by  
590 a V-H<sup>+</sup>-ATPase in the isolated perfused larval *Drosophila* midgut. *J Membr Biol.* **206(1)**, 61-72.
- 591 **Siju, K.P., Reifenrath, A., Scheiblich, H., Neupert, S., Predel, R., Hansson, B.S.,**  
592 **Schachtner, J. and Ignell, R.** (2014). Neuropeptides in the antennal lobe of the yellow fever  
593 mosquito, *Aedes aegypti*. *J Comp Neurol.* **522(3)**, 592-608.
- 594 **Skiebe, P., Biserova, N.M., Vedenina, V., Borner, J. and Pfluger, H.J.** (2006) Allatostatin-  
595 like immunoreactivity in the abdomen of the locust *Schistocerca gregaria*. *Cell Tissue Res.*  
596 **325(1)**, 163-174.
- 597 **Vanderveken, M. and O'Donnell, M.J.** (2014). Effects of diuretic hormone 31, drosokinin and  
598 allatostatin A on transepithelial K<sup>+</sup> transport and contraction frequency in the midgut and hindgut  
599 of *Drosophila melanogaster*. *Arch Insect Biochem Phys.* **85**, 76-93.

- 600 **Veenstra, J.A., Lau, G.W., Agricola, H.J. and Petzel, D.H.** (1995). Immunohistological  
601 localization of regulatory peptides in the midgut of the female mosquito *Aedes aegypti*.  
602 *Histochem Cell Biol.* **104(5)**, 337-347.
- 603 **Veenstra, J.A.** (2009). Peptidergic paracrine and endocrine cells in the midgut of the fruit fly  
604 maggot. *Cell Tissue Res.* **336(2)**, 309-323.
- 605 **Wang, J., Meyering-Vos, M. and Hoffmann, K.H.** (2004). Cloning and tissue-specific  
606 localization of cricket-type allatostatins from *Gryllus bimaculatus*. *Mol Cell Endocrinol.* **227(1-2)**, 41-51.
- 608 **Williams, D.D. and Williams, N.E.** (1998). Aquatic insects in an estuarine environment:  
609 densities, distribution and salinity tolerance. *Freshw Biol.* **39(3)**, 411-421.
- 610 **Williamson, M., Lenz, C., Winther, A.M.E., Nassel, D.R. and Grimmelikhuijzen, C.J.P.**  
611 (2001). Molecular cloning, genomic organization, and expression of a C-type (manduca sexta-  
612 type) allatostatin preprohormone from *Drosophila melanogaster*. *Biochem Biophys Res*  
613 *Commun.* **282(1)**, 124-130.
- 614 **Yoon, J.G. and Stay, B.** (1995). Immunocytochemical localization of diploptera punctata  
615 allatostatin-like peptide in *Drosophila melanogaster*. *J Comp Neurol.* **363(3)**, 475-488.
- 616 **Yu, C.G., Stay, B., Ding, Q., Bendena, W.G. and Tobe, S.S.** (1995). Immunochemical  
617 identification and expression of allatostatins in the gut of *Diploptera punctata*. *J Insect Physiol.*  
618 **41(12)**, 1035-1043.
- 619 **Zitnan, D., Sehna, F. and Bryant, P.J.** (1993). Neurons producing specific neuropeptides in  
620 the central-nervous-system of normal and pupariation-delayed drosophila. *Dev Biol.* **156(1)**,  
621 117-135.

622

## FIGURE CAPTIONS

**Figure 1. Allatostatin-like immunoreactivity (AST-IR) in the central nervous system and gut of larval *C. riparius*.** A) Anterior midgut with AST-IR endocrine cells, inset: 2 AST-IR endocrine cells. B) Posterior midgut with AST-IR endocrine cells. Arrowheads point to an AST-IR process originating from cells in the terminal ganglion. C) Brain. Arrows point to AST-IR neurons; arrowheads point to processes crossing the midline. D) Representative abdominal ganglion. Arrowheads point to a process with varicosities. E) Terminal ganglion. Arrows indicate soma of AST-IR cells. F) Proctodeal nerves from terminal ganglion which innervate the hindgut. Arrowheads point to AST-IR processes. G) Portion of rectum and ileum with AST-IR process (arrowheads). H) Portion of rectum with AST-IR process (arrowheads). (Scale bars: A = 100µm, Inset = 10µm; B = 20µm; C = 100µm; D = 20µm; E = 20µm; F = 10µm; G = 100µm; H = 50µm).

**Figure 2. Diagrammatical representation of allatostatin-like immunoreactivity (AST-IR) in the central nervous system and gut of larval *C. riparius*.** (A) Gastrointestinal tract. Black circles represent AST-IR neuroendocrine cells. Three distinct regions of AST-IR neuroendocrine cells are located in the midgut. AST-IR processes on the hindgut and lower midgut, originating from neurons in the terminal ganglion, are shown. (B) Brain, representative thoracic and abdominal ganglia and terminal ganglion. Black circles represent AST-IR neurons. AST-IR processes originating from the brain and extending the length of the nervous system are shown. Processes originating from a pair of neurons in the terminal ganglion which project to the hindgut are shown. Diagrams are not to scale.



**Figure 3. Hindgut muscle contractions of larval *C. riparius*.** Contractions were detected and recorded with an impedance monitor connected to a data acquisition system. Contractions appear as vertical deflections on the traces and these were monitored in either saline (spontaneous) or the indicated dose of Dippu-AST7.

**Figure 4. Effect of Dippu-AST7 on the frequency of hindgut contractions.** Contraction frequency measured in the presence of the peptide was expressed as the percentage of baseline frequency of contractions measured prior to the addition of the peptide. Data are plotted as the mean  $\pm$  SEM (n = 4-14). Addition of saline without peptide was used as a control (not shown) and resulted in a mean of  $105 \pm 7.2$  % of baseline frequency of contractions. Asterisk denotes significant difference from control (ANOVA  $p < 0.001$ , Tukey Kramer Multiple Comparisons Test  $p < 0.05$ , non-linear curve fit R-square = 0.8).

**Figure 5. Effect of Dippu-AST7 on  $K^+$  absorption by the rectum of larval *C. riparius*.**  $K^+$  fluxes were recorded adjacent the saline bathed rectum with the Scanning Ion-selective Electrode Technique prior to and after the addition of Dippu-AST7 at the indicated doses. Data are expressed as the difference in the  $K^+$  fluxes prior to and after addition of Dippu-AST7. Controls received addition of saline only with no peptide. An asterisk denotes significant difference from the control group (Kruskal-Wallis Test  $p = 0.002$ , Dunn's Multiple Comparisons Test  $p < 0.05$ , n = 5-10).

**Figure 6. Effects of  $10^{-8}$  mol l<sup>-1</sup> Dippu-AST7 on NKA and VA activities in the rectum of larval *C. riparius*.** Isolated recta were incubated in either saline (control) or saline containing  $10^{-8}$  mol l<sup>-1</sup> Dippu-AST7 for 10 minutes. After incubation, the recta were flash frozen and processed for NKA and VA activity assays. An asterisk denotes significant difference from the saline control (Student's *t* test,  $p < 0.05$ ,  $n = 5$ ).

**Figure 7. NKA and VA protein expression in recta of freshwater and brackish water-reared *C. riparius* larva.** Recta were isolated from larva reared in either freshwater (FW; control) or brackish water (BW), and then flash frozen prior to processing for Western blot analysis. (A) Representative Western blot of NKA and VA protein expression in recta from FW and BW reared animals. (B) Densitometric analysis of NKA and VA protein abundance in recta collected from FW and BW reared larva. An asterisk denotes significant difference from the FW (control) group (Student's *t* test,  $p < 0.05$ ,  $n = 3$ ).

Figure 1

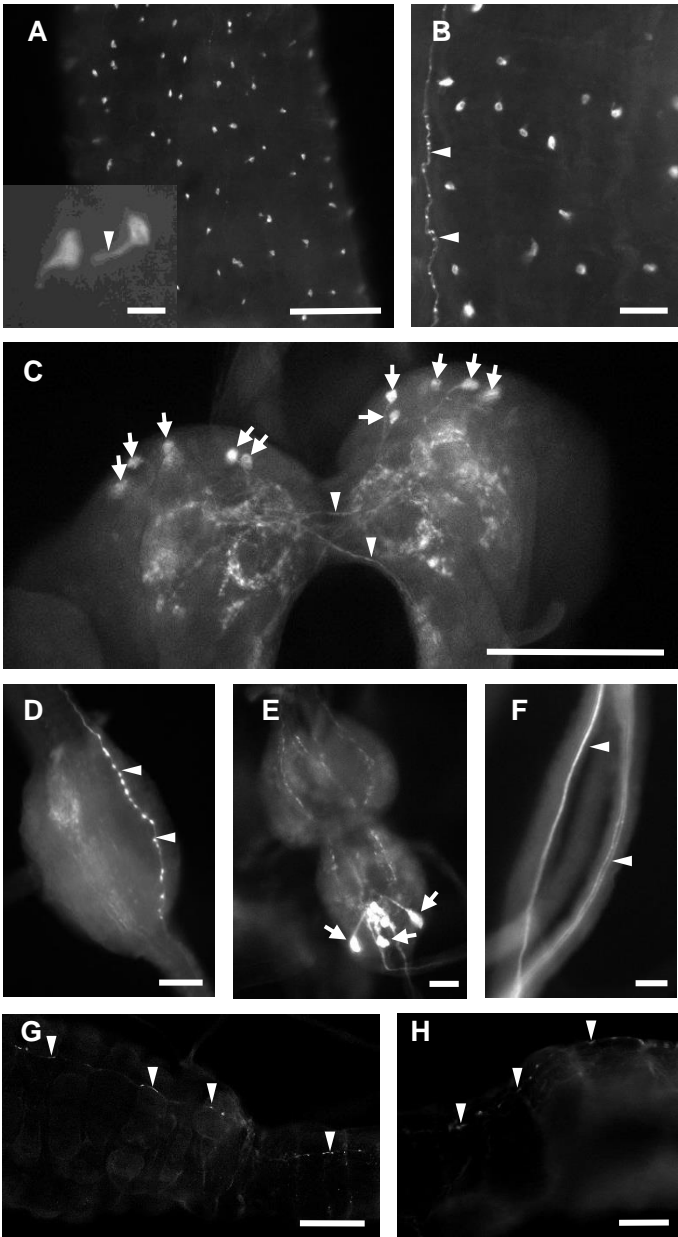

Figure 2

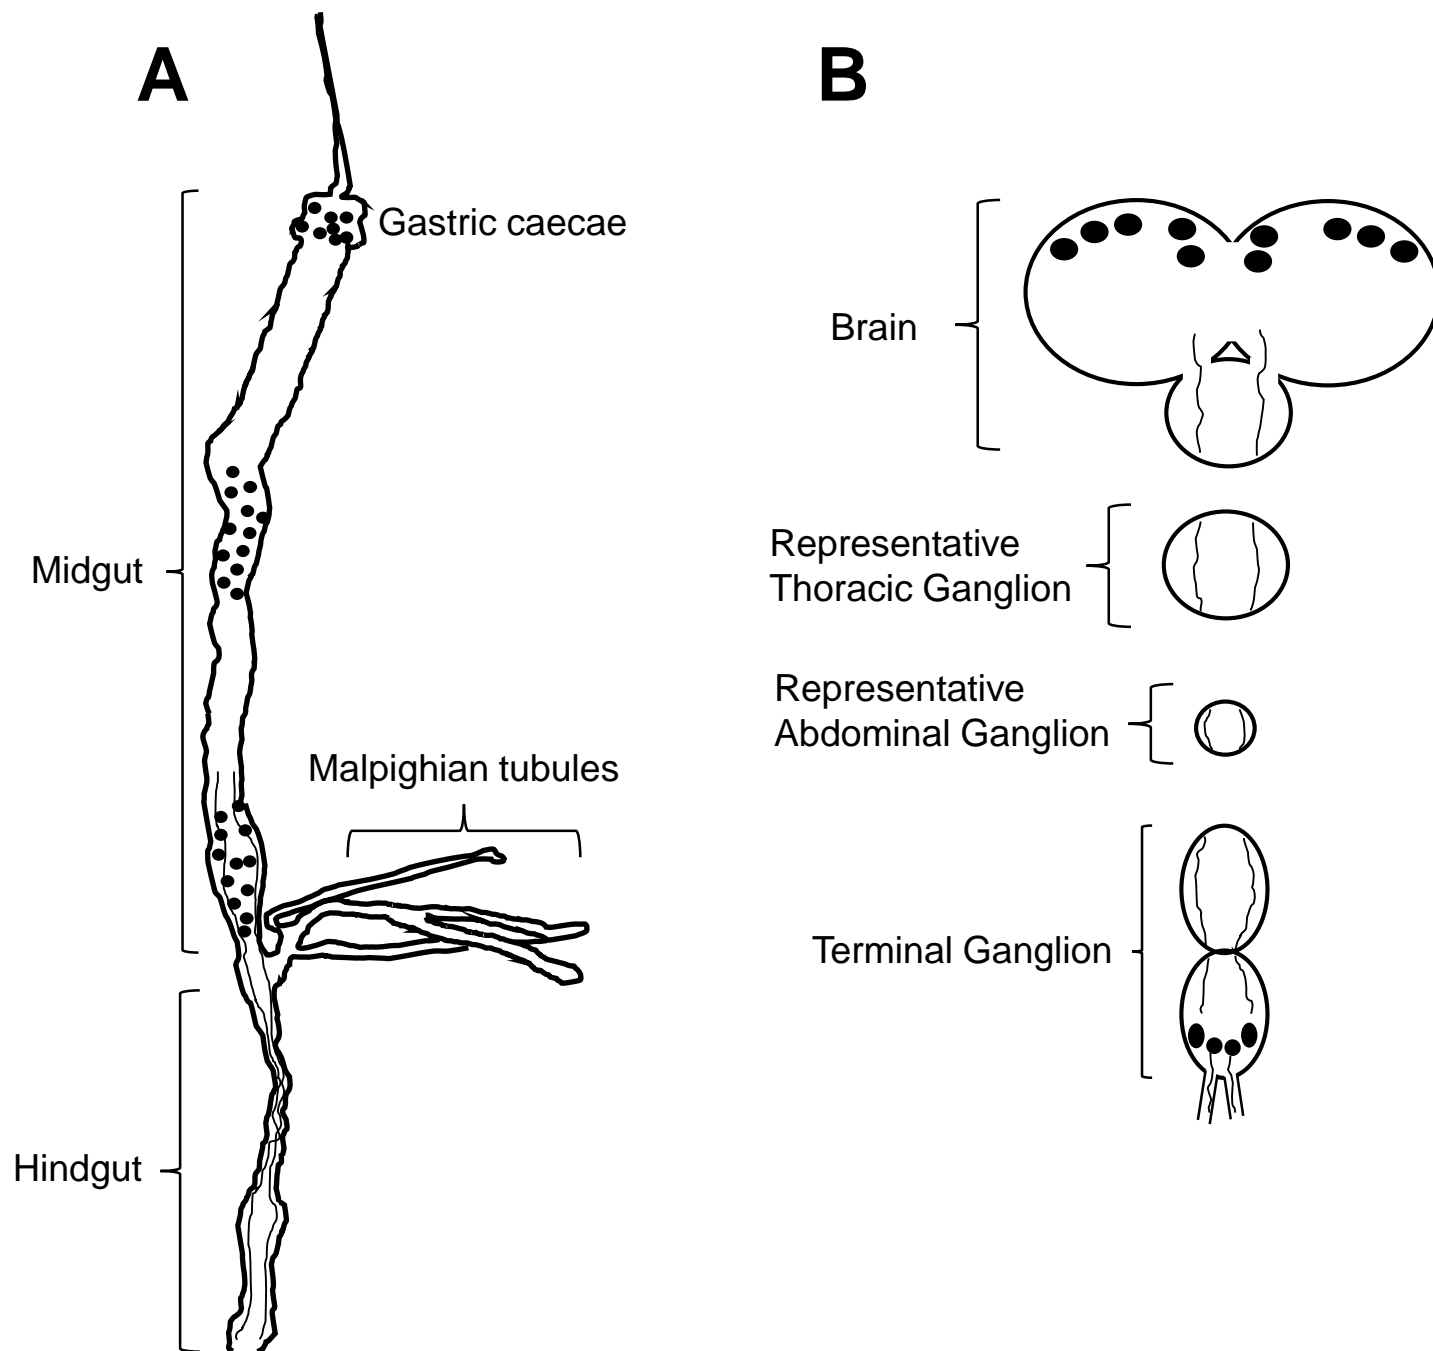

Figure 3

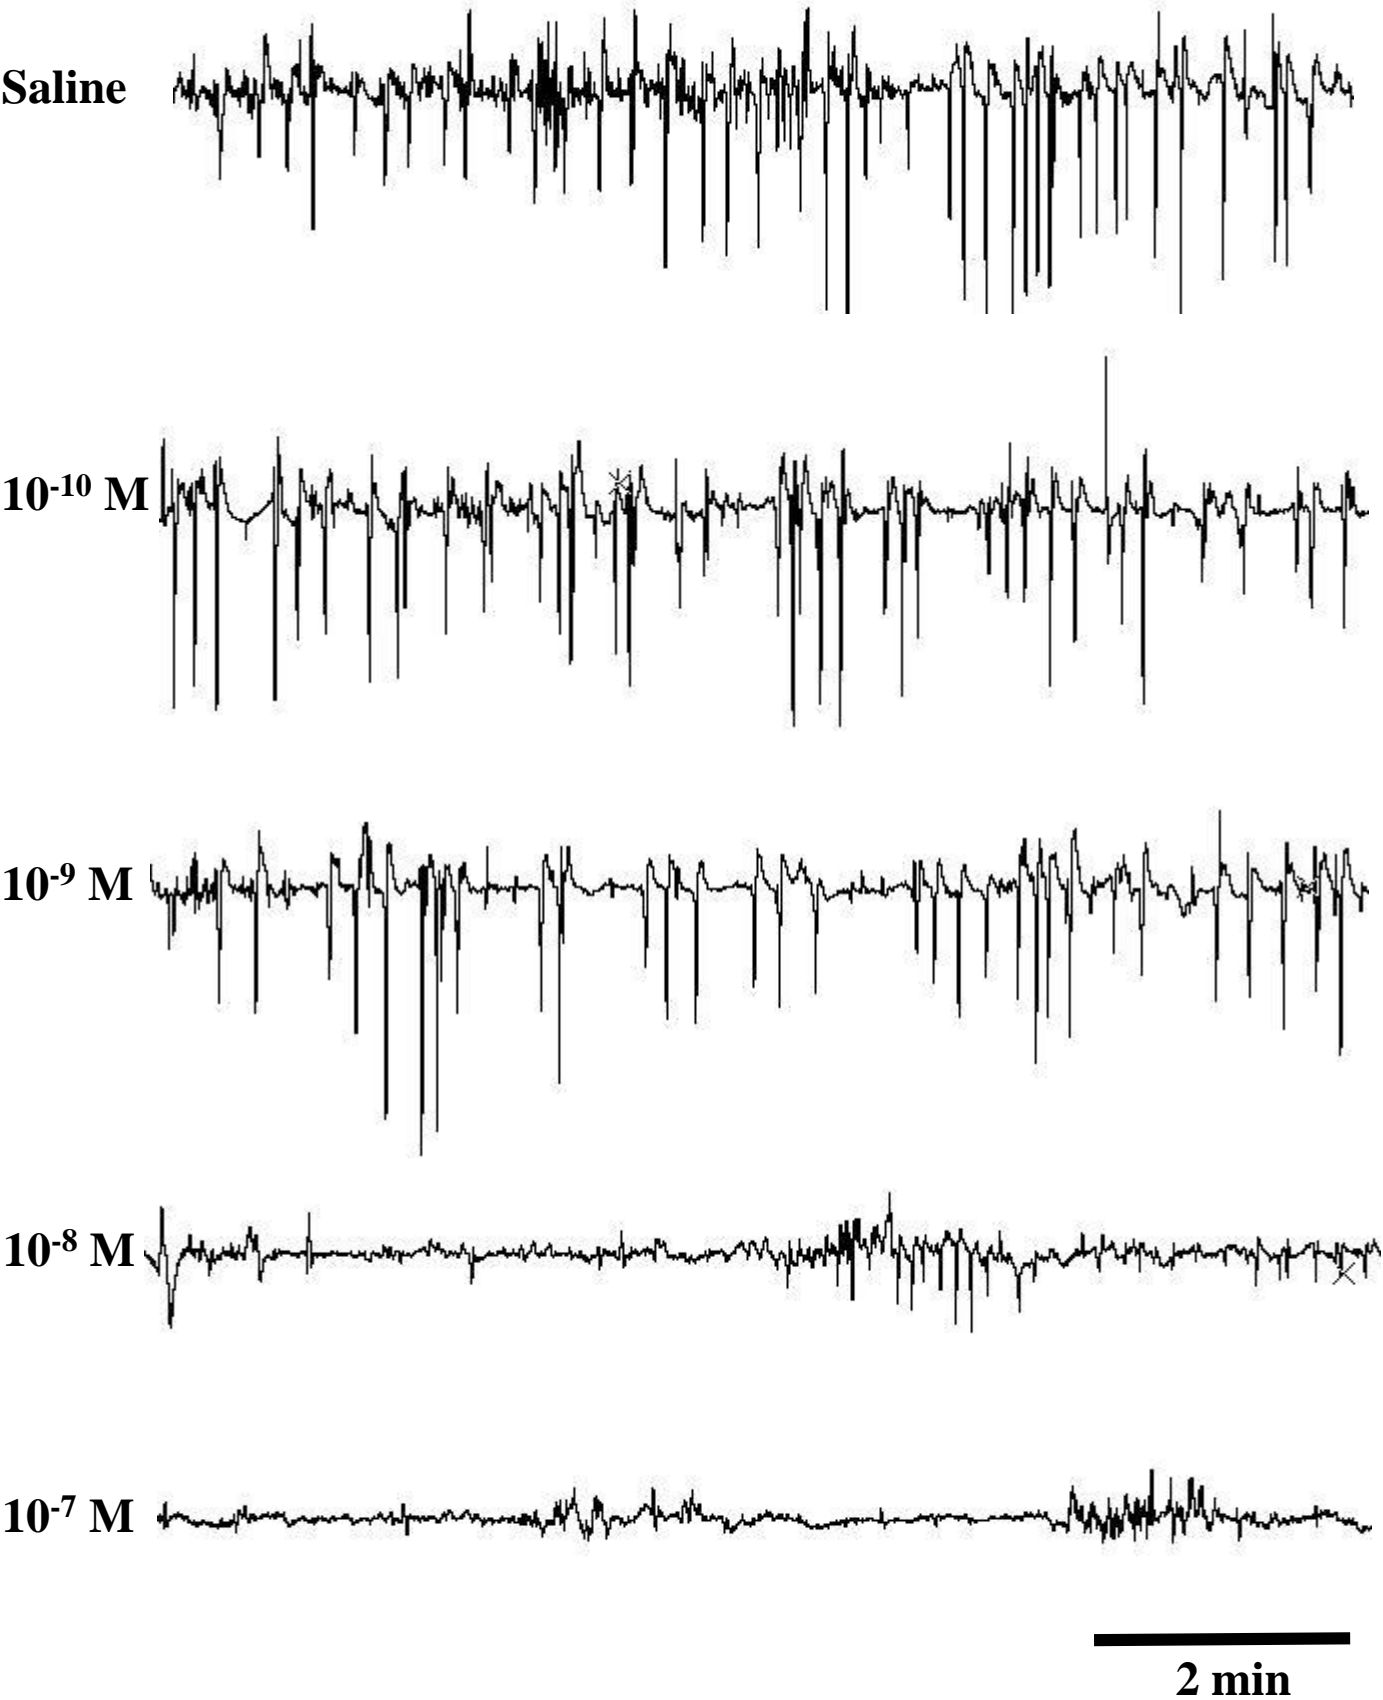

**Figure 4**

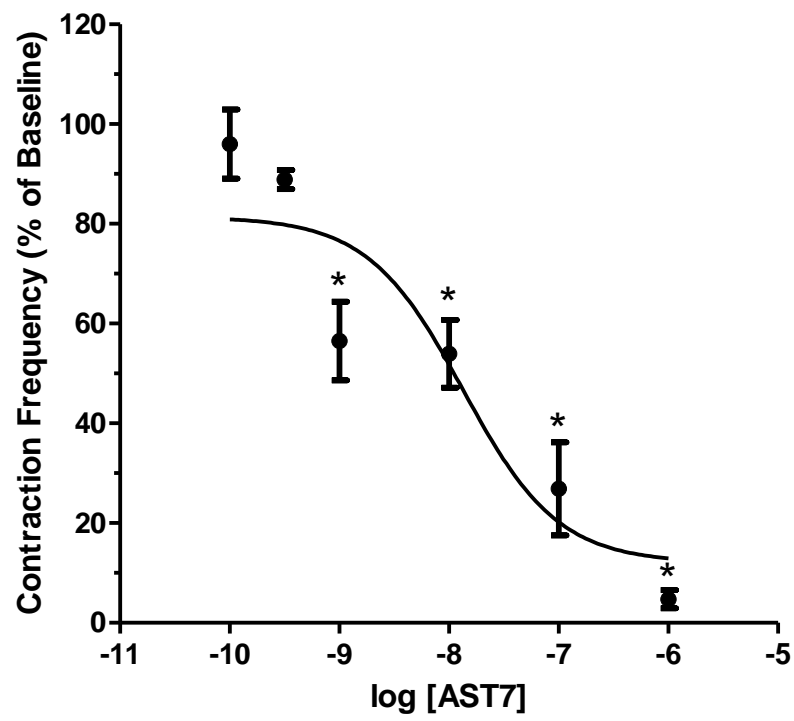

Figure 5

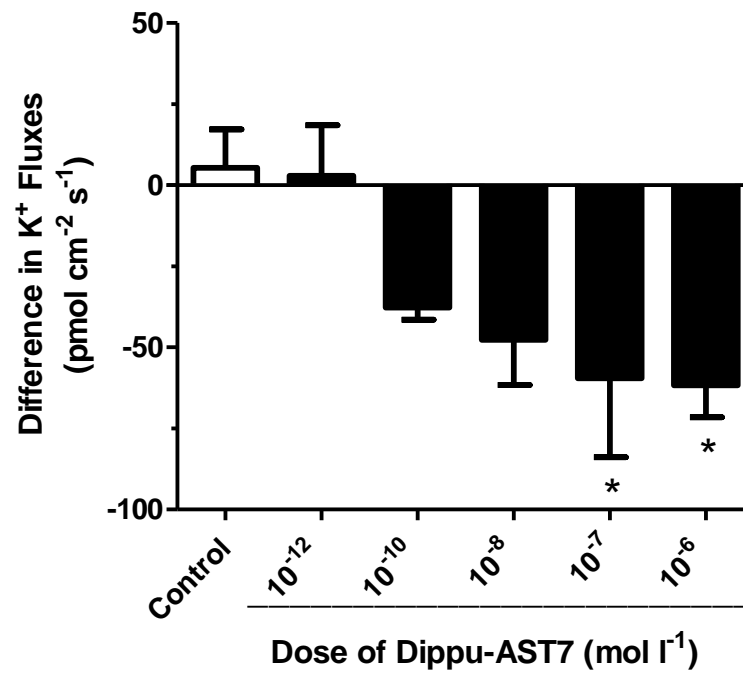



Figure 6

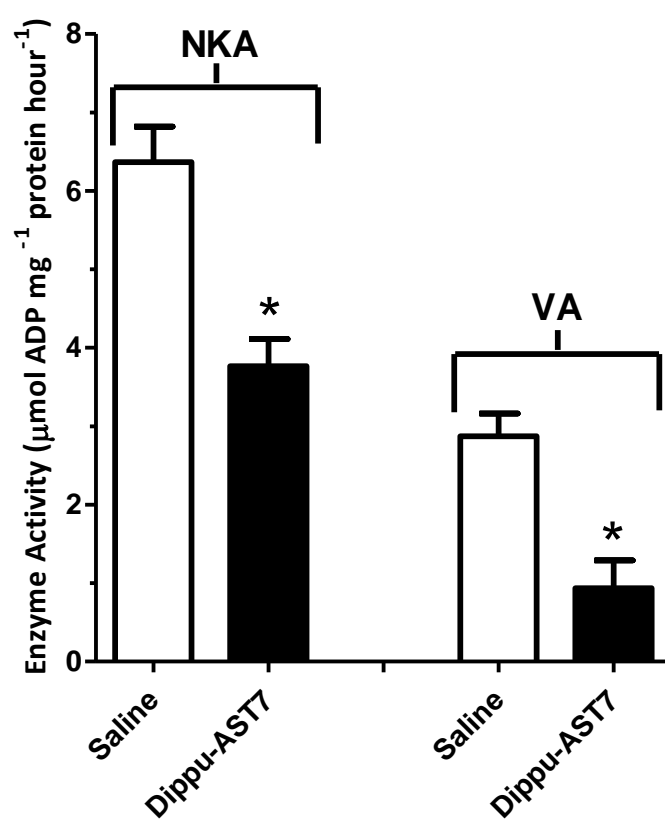

**Figure 7**

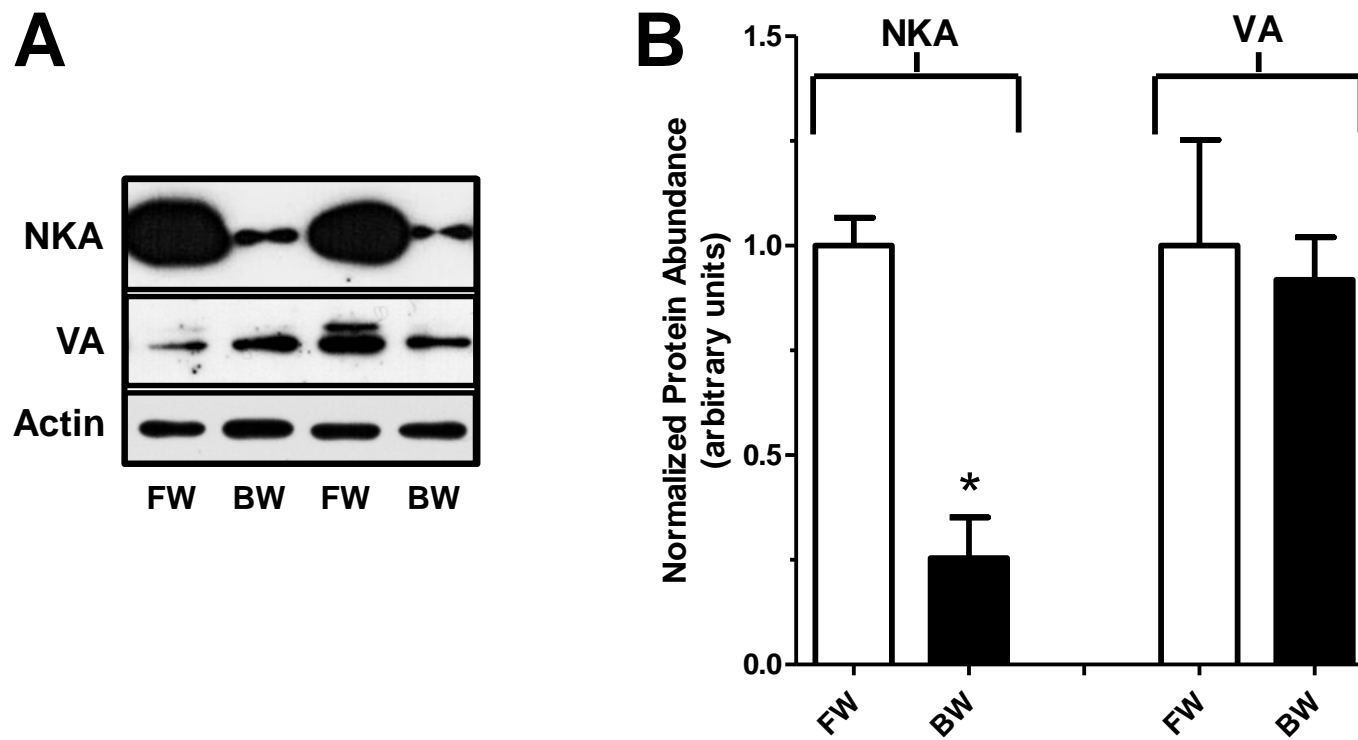

Source: https://cob.silverchair.com/jeb/article-pdf/doi/10.1242/jeb.108985/2038194/jeb_108985.pdf
